# Supplementary material
Source: publisher site journal article supplement (http://edge.sagepub.com/sites/default/files/Appendix_1.pdf)
Supplement: Supplementary file 1 [file Appendix_1.pdf]

# Appendix I

## Complete Collection of 50 Text Structures

### Stepping Up to A New Role

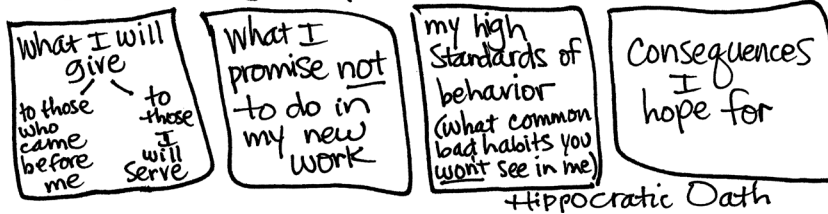

### Humble Request for help

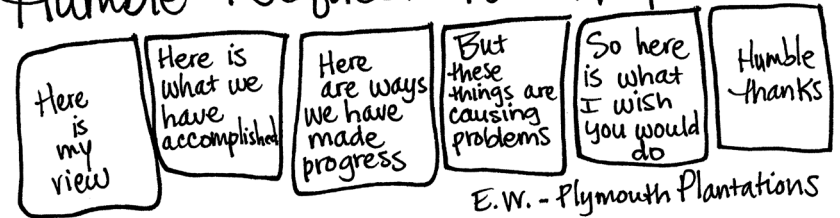

### Can't We Just Get Along?

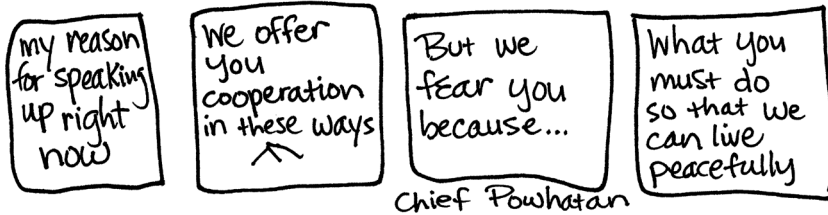

### No, Thank You

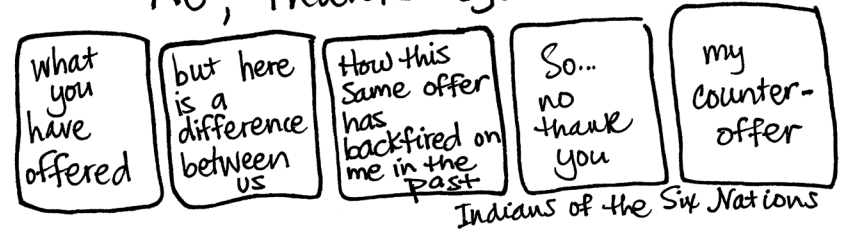

### Team Promise

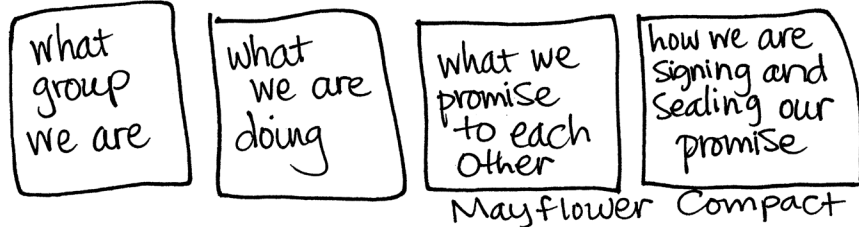

### Lighting a Fire Under a Procrastinator

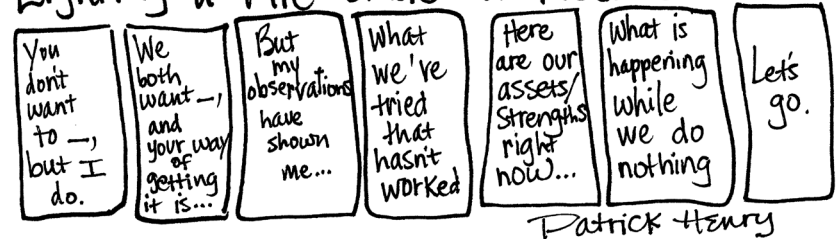

## How Bullying Works

where they see you (or find you)    what they demand from you    what they will do if you refuse    how people usually react

Janet Shaw

## How Bad Is It? (A Description)

greeting (or apology for this interruption)    what the situation is/was    contributing factors (how bad is it?) Let me count the ways.    one possible solution

Benjamin Rush

## Problem - Solution Message

what you believe about your topic    the problem    your personal proof    solutions that have been tried unsuccessfully    your solution

Thomas Jefferson

## Reprimanding a Group

Shame on you for... (doing this)    I have earned your respect, so listen...    Description of instigators    Be patient. We're not perfect. (why?)    I urge you to speak up against this behavior    People will look back on this day and admire you

George Washington

## Time for a Real Solution

Everyone agrees we need to change this one thing    But here is what has been stopping us    Reasons why the change would work now    What happens if we fix this only temporarily (for now)    how we should fix it for the long-term

Thomas Paine

## Purposes of an Action

who we are    why we are doing this (more than one)    what we are doing

Preamble to the Constitution

## Letter from Home

things I wish you would tell me about    news from here    changes in the feelings here    one thing I wish you would do    why I wish you'd do that

Abigail Adams

## Charm Check

Is — still around?    what it looks (or looked) like    Some problems it faced    Do I/we still have it?

Francis Scott Key

(continued)...

## S.O.S.

what our situation is right now  
what is being asked of me  
how I have responded  
what I need from you  
what will happen if I don't get help  
one happy note

William B. Travis

## Controversial Decision

what the decision is  
reasons for the decision  
who may disagree  
request for civilized manners (not violence)  
new habits this will create  
why I made this decision

Emancipation Proclamation

## Sightseeing

what it looks like up ahead  
what it sounds like, as we get closer  
signs we can see that others have been here before us  
my overall impression of this spot

Charles Dickens

## At the Moment of a Milestone

how this began - or - what we set out to accomplish  
where we are right now and why  
what others have contributed so far  
what we need to do from now on

Gettysburg Address

## Tour of an Unfamiliar Place

where we begin  
what we see  
what we hear  
the most surprising or shocking part  
who created this

Labor Reformer

## We're Both Wrong; We're Both Right

here's what has been happening  
here are both sides of the conflict  
we can't both be right  
we share the blame  
let's heal the damage

Abraham Lincoln

## Breaking Into a Heated Argument

the sides of the argument  
you say this, but it's not true because...  
you also say this, but it's not true because...  
and you also say this, but...  
so this is what will make things right...

Sojourner Truth

## Letter to an Author

what beliefs we share  
how we are different  
what you've accomplished  
how I admire you

Frederick Douglass



## Fighting Unfairness with Logic

What I want to communicate  
If this is true  
And if this is also true  
then this must be true  
a ridiculous question (twisting the 3rd box)

Susan B. Anthony

## First Earnings

job description  
how I looked doing the job  
my hours and wages  
how I spent it

Bertha Miller

## Valuable Advice

Why I'm giving you this advice  
one rule and how it works  
another rule and how it works  
another rule and how it works  
another rule and how it works  
If you follow these, then...

Mark Twain

## My Symbol

I feel (how)  
...about this symbol...  
...and what the symbol represents in my life...  
...which is important to me because...

Pledge of Allegiance

## Comforting a Friend in Pain

I know you're suffering  
A thought about life's ups and downs  
Advice: use the bad feeling; don't be used by it  
What all you should do or not do  
you will prevail

Henry James

## Narrative: Just the Facts

what happened first  
what happened next  
what happened last

Ida B. Wells-Barnett

## I Want More (while I Have the Chance)

We recently did this  
We got this  
So that makes me want this  
Because in the future, it will be too late

William G. Hornaday

## Letter of Recommendation

my years of experience with this person/group  
What I've noticed about this person/group  
What I feel about this person/group

Clara Barton

## Why Something Goes Viral

one effect these have on people

my example of one that went viral

another version of it

what makes people stop, notice, and share

Jane Addams

## How An Experience Changed Me

what I was like before this experience

why I went (or did it)

how I improved

what one person said to me that helped me the most

how it changed me

who gave me this opportunity

Robert L. Miller

## Understanding the Scars of Our Elders

my curious question to someone

their answer (a memory)

what that leads me to promise

how I will keep (or have kept) this promise

Tonea Stewart

## A Bad Situation A Lot of Us Are In

a description of how bad we have it

what we wish we could do for ourselves

how many of us there are

the worst part

what we can do to make things better

Lester Hunter

## Objects of Affection

one kind

the best kind

ways to make a place for this object

how this object connects you to other people

William Lyon Phelps

## Picking up the Pieces

what happened

why I didn't see it coming

the damage it has caused

what we will do about it

Franklin D. Roosevelt

## True or False? Neither

Question: Is — true or false?

Answer: This part is not true

but I don't know everything

and this part is true

So my definition is different from yours

Albert Einstein

## Heads Up from Your Wingman

I just heard this...

Which upset these people...

and here is what I think you should do or say

Why you should handle it with care

Eleanor Roosevelt

## What Do I Mean? Well...

You asked  
me to explain  
"....."

Part of it  
means  
this...

Another part  
of it does  
not mean...

What the  
whole thing  
really means...

Ayn Rand

## Parting Advice to Your Replacement

Character  
traits \*  
that are most  
important  
to you

What \*  
(char. traits)  
do, teach you,  
give you,  
creates in you

Who  
you  
will  
serve

How to  
give  
them  
\*  
(char. traits)

What  
memories  
you  
will  
create

Good-  
bye

Douglas MacArthur

## My Advice About Your Strong Feeling

I see  
that you  
feel ...

Two kinds  
of  
that feeling  
(good and bad)

What you  
should do  
about those  
feelings

How I think  
you should  
show those  
feelings

Parting  
thought

John Steinbeck

## Bon Voyage

How we  
share this  
with you

The most  
valuable  
thing you'll get  
from this  
experience

I  
believe in  
a  
higher power

I  
ask that  
you be  
protected

Marion Scott Carpenter

## Pep Talk

What  
this  
new  
chapter  
is

Our  
plan  
or  
goal

Promises  
to  
everyone

Our  
biggest  
problem  
to face  
soon

How  
we  
should  
face  
it

What  
it  
will  
cost  
us

What  
help  
I  
ask  
from  
you

I'll  
go  
first

John F. Kennedy

## I Feel Your Pain

Our  
bond  
(who  
we  
are)

Wrong  
ideas  
other  
people have  
about you

What  
you're  
dealing with  
(and why  
it's bad)

How if it's  
bad for one  
person, it's  
bad for  
all

Imagine  
good for  
all  
(how that  
will look)

What  
we will  
say when  
that  
day comes

John F. Kennedy

## Memory Reflection

Where  
I  
was

What  
happened  
first

What  
happened  
next

What  
happened  
last

What  
I  
learned  
or  
noticed

John Howard Griffin

## Flashpoint Moment of Truth

What  
just  
happened

What  
that  
triggered

What we  
promise  
to all

How we  
don't deliver  
to some

What I'm  
going to  
do about  
it

Lyndon B. Johnson

## Walking the Walk to Make a Difference

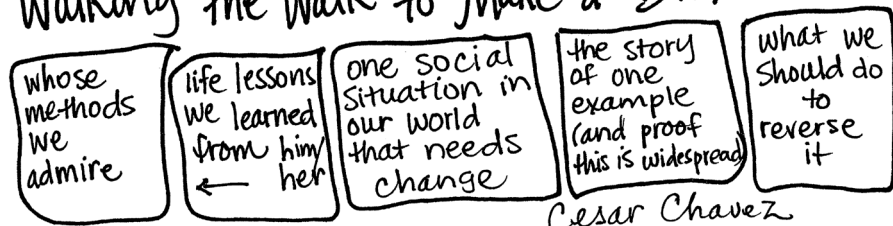

Cesar Chavez

## New Perspectives from a Photo

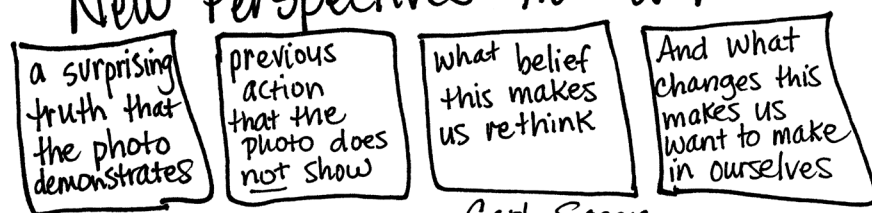

Carl Sagan

## Using a Story to Make a Point

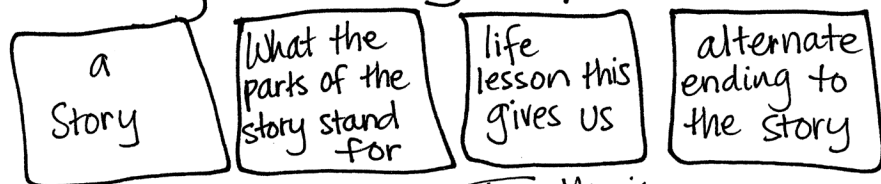

Toni Morrison

## So You'll Know Me After I'm Gone

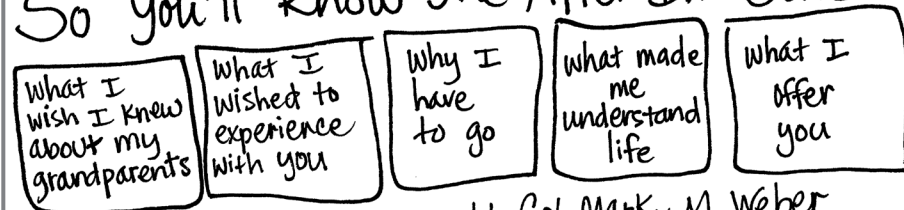

Lt. Col. Mark M. Weber
